# Supplementary material for: The Pan Language-Based Editing System For Integrated Development Environments*
Source: MDPI journal article supplement (doi:10.3390/ani14081173), 1999-01-01
Supplement: s1 [file s1]

Supplementary Table S1: Ethogram of long-tailed macaque (*Macaca fascicularis*) behaviour and structure use.

| Behaviour States               | Code | Description                                                                                                                                                  |
|--------------------------------|------|--------------------------------------------------------------------------------------------------------------------------------------------------------------|
| <b>Inactive</b>                |      |                                                                                                                                                              |
| Inactive resting               | IR   | Maintaining a posture with no other behaviour being performed. Eyes are shut.                                                                                |
| Inactive alert                 | IA   | Maintaining a posture with no other behaviour being performed. Eyes are opened while monitoring around.                                                      |
| Inactive back                  | IB   | Maintaining a posture with no other behaviour being performed with the back turned away. Unable to see monkeys face.                                         |
| <b>Travel</b>                  |      |                                                                                                                                                              |
|                                | T    | Terrestrial or arboreal movement from one place to another done by one or more members in a group.                                                           |
| <b>Feeding natural</b>         | FO   | Searching, manipulating, and consuming natural occurring items/non anthropogenic                                                                             |
| <b>Feeding unnatural</b>       | FON  | Searching, manipulating, and consuming items from an unnatural source e.g. trash bins.                                                                       |
| <b>Affiliative Interaction</b> |      |                                                                                                                                                              |
| Grooming                       | G2   | One individual combs through another individuals coat using its fingers while picking, scratching or removing objects from the hair. May or may not consume. |
| Play                           | P    | Wrestling, thumbing, rough playing or chasing involving two or more individuals in a non-aggressive manner.                                                  |
| Object play                    | OP   | Using an object individually or with play mates for purpose of play. Licking or putting to mouth can be seen occasionally but not used predominantly to eat. |
| Being groomed                  | BG   | An animal is in an inactive position while receiving grooming from another individual or more than one individual.                                           |

|                       |    |                                                                                                                                                                            |
|-----------------------|----|----------------------------------------------------------------------------------------------------------------------------------------------------------------------------|
| <b>Aggression</b>     | X  | Aggressive behaviour such as threats, grabbing, fighting, biting etc shown to an individual, a few individuals, humans or other species                                    |
| <b>Sexual</b>         | S  | Mounting with intromission. The male mounts the female and uses his legs to grip the female and hands are grasping the female's waist. May be accompanied by vocalization. |
| <b>Self- grooming</b> | G  | An individual combs its own fur using its fingers while picking, scratching, or removing objects from the hair. May or may not consume.                                    |
| Solitary play         | P1 | An individual walks with a bouncy gait, jumps and rolls about sometimes trying to catch its tail. Can be using objects from the environment as well.                       |

---

| Structure                      | Symbol |
|--------------------------------|--------|
| <b>Anthropogenic structure</b> |        |
| Electric post                  | e      |
| Picnic table/chair             | pt/pc  |
| Roof                           | r      |
| Roadside divider               | rd     |
| Structure                      | s      |
| Vehicle                        | v      |
| Building                       | b      |
| Dustbin                        | d      |
| Fence                          | f      |
| Tower                          | tw     |
| Road                           | o      |
| Poles                          | p      |
| <b>Natural structures</b>      |        |
| Tree                           | t      |
| Ground                         | g      |

Supplementary Table S2: Multiple logistic regression model response variable and covariates.

| Response Variable<br>(Behaviour) | Covariate               | Reference              |
|----------------------------------|-------------------------|------------------------|
| Travel                           | Anthropogenic substrate | Natural substrate only |
|                                  | Sunny weather           | Cloudy weather         |
|                                  | Human presence          | Humans absent          |
|                                  | Medium traffic area     | Low traffic area       |
|                                  | High traffic area       | Low traffic area       |
| Inactive                         | Anthropogenic substrate | Natural substrate only |
|                                  | Sunny weather           | Cloudy weather         |
|                                  | Human presence          | Humans absent          |
|                                  | Medium traffic area     | Low traffic area       |
|                                  | High traffic area       | Low traffic area       |
| Interaction                      | Anthropogenic substrate | Natural substrate only |
|                                  | Sunny weather           | Cloudy weather         |

|                      |                         |                        |
|----------------------|-------------------------|------------------------|
|                      | Human presence          | Humans absent          |
|                      | Medium traffic area     | Low traffic area       |
|                      | High traffic area       | Low traffic area       |
| Feeding Natural      | Anthropogenic substrate | Natural substrate only |
|                      | Sunny weather           | Cloudy weather         |
|                      | Human presence          | Humans absent          |
|                      | Medium traffic area     | Low traffic area       |
|                      | High traffic area       | Low traffic area       |
| Feeding<br>Unnatural | Anthropogenic substrate | Natural substrate only |
|                      | Sunny weather           | Cloudy weather         |
|                      | Human presence          | Humans absent          |
|                      | Medium traffic area     | Low traffic area       |
|                      | High traffic area       | Low traffic area       |
| Autogrooming         | Anthropogenic substrate | Natural substrate only |
|                      | Sunny weather           | Cloudy weather         |
|                      | Human presence          | Humans absent          |

|  |                     |                  |
|--|---------------------|------------------|
|  | Medium traffic area | Low traffic area |
|  | High traffic area   | Low traffic area |
